# Supplementary material for: Remodeling neuronal ER–PM junctions is a conserved nonconducting function of Kv2 plasma membrane ion channels
Source: PubMed Central journal article supplement — Mol Biol Cell. 2018 Oct 1;29(20):2410–32. doi: 10.1091/mbc.E18-05-0337 (PMC6233057; doi:10.1091/mbc.e18-05-0337), 2018-10-01
Supplement: mbc-29-2410-s001.pdf [file mbc-29-2410-s001.pdf]

# Supplemental Materials

*Molecular Biology of the Cell*

Kirmiz et al.

**Supplemental Table 1. Figure 2C**

| Sample  | ER-PM junction size ( $\mu\text{m}^2$ ) | n number | p-value (two-tailed, unpaired t-test)     |
|---------|-----------------------------------------|----------|-------------------------------------------|
| Kv2.2   | $1.98 \pm 0.97$                         | 12 cells | vs. control, ****, $7.164 \times 10^{-5}$ |
| Kv2.1   | $1.69 \pm 0.60$                         | 12 cells | vs. control, ****, $4.512 \times 10^{-6}$ |
| Kv1.4   | $0.49 \pm 0.20$                         | 12 cells | vs. control, ns, 0.3602                   |
| control | $0.57 \pm 0.25$                         | 12 cells | N/A                                       |

**Supplemental Table 2. Figure 2D**

| Sample  | PM occupancy (%) | n number | p-value (two-tailed, unpaired t-test)     |
|---------|------------------|----------|-------------------------------------------|
| Kv2.2   | $34.9 \pm 6.1$   | 12 cells | vs. control, ****, $4.680 \times 10^{-8}$ |
| Kv2.1   | $33.0 \pm 5.8$   | 12 cells | vs. control, ****, $1.634 \times 10^{-7}$ |
| Kv1.4   | $14.7 \pm 5.5$   | 12 cells | vs. control, ns, 0.4256                   |
| control | $16.4 \pm 5.0$   | 12 cells | N/A                                       |

**Supplemental Table 3. Figure 2E**

| Sample | PCC Kv: DsRed2-ER5 | n number | p-value (two-tailed, unpaired t-test)    |
|--------|--------------------|----------|------------------------------------------|
| Kv2.2  | $0.88 \pm 0.04$    | 15 cells | vs. Kv1.4, ****, $2.585 \times 10^{-21}$ |
| Kv2.1  | $0.87 \pm 0.08$    | 15 cells | vs. Kv1.4, ****, $5.768 \times 10^{-19}$ |
| Kv1.4  | $0.26 \pm 0.08$    | 15 cells | N/A                                      |

**Supplemental Table 4. Supplemental Figure 1**

| Sample               | PCC with GxTX   | n number | p-value (ANOVA followed by Tukey's multiple comparisons test) |
|----------------------|-----------------|----------|---------------------------------------------------------------|
| SEP-Kv2.1 (pHluorin) | $0.85 \pm 0.06$ | 10 cells | vs. mCherry, ns, 0.5102; vs. SEC61 $\beta$ , *, 0.0396        |
| SEP-Kv2.1 (mCherry)  | $0.86 \pm 0.06$ | 10 cells | vs. SEC61 $\beta$ , *, 0.0259                                 |
| SEC61 $\beta$        | $0.78 \pm 0.11$ | 10 cells | N/A                                                           |

**Supplemental Table 5. Figure 3C**

| Sample     | PCC with GxTX | n number | p-value (two-tailed, unpaired t-test) |
|------------|---------------|----------|---------------------------------------|
| Kv2.2      | 0.90 ± 0.06   | 13 cells | vs. DsRed2-ER5, *, 0.01211            |
| DsRed2-ER5 | 0.78 ± 0.14   | 13 cells | N/A                                   |

**Supplemental Table 6. Figure 5C**

| Sample               | Size (μm <sup>2</sup> ) | n number | p-value (two tailed, paired t-test) |
|----------------------|-------------------------|----------|-------------------------------------|
| Kv2.2 clusters rest  | 0.41 ± 0.12             | 7 cells  | vs. +LatA, ***, 0.0007              |
| Kv2.2 clusters +LatA | 1.01 ± 0.30             | 7 cells  | N/A                                 |
| Kv2.1 clusters rest  | 0.48 ± 0.19             | 7 cells  | vs. +LatA, **, 0.0019               |
| Kv2.1 clusters +LatA | 0.69 ± 0.18             | 7 cells  | N/A                                 |

**Supplemental Table 7. Figure 5D**

| Sample          | Size (μm <sup>2</sup> ) | n number | p-value (two tailed, paired t-test) |
|-----------------|-------------------------|----------|-------------------------------------|
| Kv2.2-EPJ rest  | 0.48 ± 0.19             | 7 cells  | vs. +LatA, **, 0.0043               |
| Kv2.2-EPJ +LatA | 0.69 ± 0.18             | 7 cells  | N/A                                 |
| Kv2.1-EPJ rest  | 0.64 ± 0.10             | 7 cells  | vs. +LatA, **, 0.0039               |
| Kv2.1-EPJ +LatA | 0.98 ± 0.22             | 7 cells  | N/A                                 |

**Supplemental Table 8. Figure 5E**

| Sample          | Number of ER:PM junctions | n number | p-value (two tailed, paired t-test) |
|-----------------|---------------------------|----------|-------------------------------------|
| Kv2.2-EPJ rest  | 104.29 ± 24.81            | 7 cells  | vs. +LatA, *, 0.0150                |
| Kv2.2-EPJ +LatA | 74.71 ± 11.04             | 7 cells  | N/A                                 |
| Kv2.1-EPJ rest  | 60.43 ± 16.69             | 7 cells  | vs. +LatA, *, 0.0161                |
| Kv2.1-EPJ +LatA | 51.14 ± 15.74             | 7 cells  | N/A                                 |

**Supplemental Table 9. Figure 5F**

| Sample      | PCC Kv2:DsRed2-ER5 | n number | p-value (two tailed, paired t-test) |
|-------------|--------------------|----------|-------------------------------------|
| Kv2.2 rest  | 0.84 ± 0.052       | 10 cells | vs. +LatA, ns, 0.2505               |
| Kv2.2 +LatA | 0.85 ± 0.055       | 10 cells | N/A                                 |
| Kv2.1 rest  | 0.82 ± 0.058       | 10 cells | vs. +LatA, ns, 0.4408               |
| Kv2.1 +LatA | 0.81 ± 0.064       | 10 cells | N/A                                 |

**Supplemental Table 10. Figure 6B and C**

| Sample | PCC with Kv2.2 | MOC with Kv2.2 | n number | PCC vs. MOC, p-value (two-tailed, paired t-test) |
|--------|----------------|----------------|----------|--------------------------------------------------|
| E-Syt2 | 0.52 ± 0.27    | 0.92 ± 0.045   | 17 cells | ****, 6.229x10 <sup>-6</sup>                     |
| E-Syt3 | 0.69 ± 0.19    | 0.98 ± 0.034   | 17 cells | ****, 5.690x10 <sup>-6</sup>                     |
| JP2    | 0.84 ± 0.13    | 0.99 ± 0.015   | 17 cells | ***, 1.057x10 <sup>-4</sup>                      |
| JP4    | 0.90 ± 0.071   | 0.98 ± 0.013   | 18 cells | ****, 7.894x10 <sup>-5</sup>                     |
| STIM1  | 0.79 ± 0.13    | 0.94 ± 0.031   | 21 cells | ****, 2.070x10 <sup>-6</sup>                     |
| STIM2a | 0.76 ± 0.051   | 0.95 ± 0.025   | 19 cells | ****, 1.1x10 <sup>-14</sup>                      |
| STIM2β | 0.82 ± 0.10    | 0.97 ± 0.016   | 17 cells | ****, 2.949x10 <sup>-6</sup>                     |

**Supplemental Table 11. Figure 6F and G**

| Sample               | PCC with Orai1 | n number | p-value (two tailed, paired t-test) |
|----------------------|----------------|----------|-------------------------------------|
| STIM1 Rest           | 0.17 ± 0.26    | 12 cells | N/A                                 |
| STIM1 +Thap          | 0.61 ± 0.19    | 12 cells | vs. Rest, ***, 0.0005092            |
| Kv2.2 Rest + STIM1   | 0.21 ± 0.26    | 12 cells | N/A                                 |
| Kv2.2 +Thap + STIM1  | 0.39 ± 0.19    | 12 cells | vs. Rest, *, 0.02501                |
| Kv2.2 Rest no STIM1  | 0.018 ± 0.29   | 16 cells | N/A                                 |
| Kv2.2 +Thap no STIM1 | 0.32 ± 0.31    | 16 cells | vs. Rest, ****, 0.00003238          |

**Supplemental Table 12. Figure 7C**

| Sample           | PCC Kv2: CB5-FKBP | n number | p-value (two tailed, paired t-test) |
|------------------|-------------------|----------|-------------------------------------|
| Kv2.2 Rest       | 0.86 ± 0.055      | 7 cells  | N/A                                 |
| Kv2.2 +Rap       | 0.19 ± 0.18       | 7 cells  | vs. Rest, ****, 0.00006706          |
| Kv2.2 +Rap +LatA | 0.14 ± 0.12       | 7 cells  | vs. +Rap, ns, 0.3099                |

**Supplemental Table 13. Figure 8B and C**

| Sample          | Current at +40 mV (nA) | n number | p-value (two-tailed, unpaired t-test) |
|-----------------|------------------------|----------|---------------------------------------|
| GFP-Kv2.2       | 5.88 ± 2.31            | 7 cells  | vs. GFP, ***, 0.000762                |
| GFP-Kv2.2 P412W | 0.70 ± 0.31            | 5 cells  | vs. GFP, ns, 0.123                    |
| GFP-Kv2.1       | 9.98 ± 4.93            | 9 cells  | vs. GFP, ***, 0.000399                |
| GFP-Kv2.1 P404W | 0.57 ± 0.27            | 6 cells  | vs. GFP, ns, 0.287                    |
| GFP             | 0.42 ± 0.16            | 7 cells  | N/A                                   |

**Supplemental Table 14. Figure 8F and G**

| Sample          | Cluster size ( $\mu\text{m}^2$ ) | n number | p-value (two-tailed, unpaired t-test) |
|-----------------|----------------------------------|----------|---------------------------------------|
| GFP-Kv2.2 P412W | $0.76 \pm 0.91$                  | 3 cells  | vs. GFP-Kv2.2, ns, 0.0637             |
| GFP-Kv2.2       | $0.99 \pm 1.14$                  | 3 cells  | N/A                                   |
| GFP-Kv2.1 P404W | $0.59 \pm 0.84$                  | 3 cells  | vs. GFP-Kv2.1, ns, 0.9441             |
| GFP-Kv2.1       | $0.59 \pm 0.79$                  | 3 cells  | N/A                                   |

**Supplemental Table 15. Figure 8H and I**

| Sample          | PCC with GxTX    | n number | p-value (two-tailed, unpaired t-test) |
|-----------------|------------------|----------|---------------------------------------|
| GFP-Kv2.2 P412W | $0.88 \pm 0.050$ | 10 cells | vs. GFP-Kv2.2, ns, 0.1531             |
| GFP-Kv2.2       | $0.91 \pm 0.039$ | 10 cells | N/A                                   |
| GFP-Kv2.1 P404W | $0.91 \pm 0.055$ | 10 cells | vs. GFP-Kv2.1, ns, 0.0863             |
| GFP-Kv2.1       | $0.94 \pm 0.030$ | 10 cells | N/A                                   |

**Supplemental Table 16. Figure 9C**

| Sample           | ER-PM junction size ( $\mu\text{m}^2$ ) | n number | p-value (ANOVA followed by Tukey's multiple comparisons test) |
|------------------|-----------------------------------------|----------|---------------------------------------------------------------|
| GFP-Kv2.2        | $1.36 \pm 0.65$                         | 10 cells | vs. control, *, 0.01308                                       |
| GFP-Kv2.2 P412W  | $1.45 \pm 0.81$                         | 10 cells | vs. Kv2.2 ns, 0.9998; vs. control, **, 0.004206               |
| GFP-Kv2.2A S605A | $0.40 \pm 0.11$                         | 10 cells | vs. control, ns, 0.9990                                       |
| GFP-Kv2.1        | $1.38 \pm 0.79$                         | 10 cells | vs. control, *, 0.01048                                       |
| GFP-Kv2.1 P404W  | $1.26 \pm 0.49$                         | 10 cells | vs. Kv2.1, ns, 0.9989; vs. control, *, 0.04155                |
| GFP-Kv2.1 S586A  | $0.47 \pm 0.081$                        | 10 cells | vs. control, ns, >0.9999                                      |
| Control          | $0.52 \pm 0.19$                         | 10 cells | N/A                                                           |

**Supplemental Table 17. Figure 9D**

| Sample          | PM coverage (%) | n number | p-value (ANOVA followed by Tukey's multiple comparisons test) |
|-----------------|-----------------|----------|---------------------------------------------------------------|
| GFP-Kv2.2       | 29.8 ± 7.0      | 10 cells | vs. control, ****, $5.507 \times 10^{-5}$                     |
| GFP-Kv2.2 P412W | 29.4 ± 6.4      | 10 cells | vs. Kv2.2, ns, >0.9999; vs. control, ***, 0.0001027           |
| GFP-Kv2.2 S605A | 12.1 ± 4.8      | 10 cells | vs. control, ns, 0.8047                                       |
| GFP-Kv2.1       | 30.1 ± 7.0      | 10 cells | vs. control, ****, $3.3938 \times 10^{-5}$                    |
| GFP-Kv2.1 P404W | 28.6 ± 6.8      | 10 cells | vs. Kv2.1, ns, 0.9977; vs. control, ***, 0.0002994            |
| GFP-Kv2.1 S586A | 15.4 ± 2.6      | 10 cells | vs. control, ns, >0.9999                                      |
| Control         | 15.9 ± 6.4      | 10 cells | N/A                                                           |

**Supplemental Table 18. Figure 9E**

| Sample          | PCC with DsRed2-ER5 | n number | p-value (ANOVA followed by Tukey's multiple comparisons test)                                |
|-----------------|---------------------|----------|----------------------------------------------------------------------------------------------|
| GFP-Kv2.2       | 0.86 ± 0.04         | 12 cells | N/A                                                                                          |
| GFP-Kv2.2 P412W | 0.88 ± 0.04         | 12 cells | vs. GFP-Kv2.2, ns, 0.9943                                                                    |
| GFP-Kv2.2 S605A | 0.44 ± 0.14         | 12 cells | vs. GFP-Kv2.2, ****, $<1 \times 10^{-15}$<br>vs. GFP-Kv2.2 P412W, ****, $<1 \times 10^{-15}$ |
| GFP-Kv2.1       | 0.86 ± 0.06         | 12 cells | N/A                                                                                          |
| GFP-Kv2.1 P404W | 0.86 ± 0.07         | 12 cells | vs. GFP-Kv2.1, ns, >0.9999                                                                   |
| GFP-Kv2.1 S586A | 0.26 ± 0.17         | 12 cells | vs. GFP-Kv2.1, ****, $<1 \times 10^{-15}$<br>vs. GFP-Kv2.1 P404W, ****, $<1 \times 10^{-15}$ |

**Supplemental Table 19. Supplementary Figure 2C**

| Sample    | ER-PM junction velocity (µm/sec) | n number | p-value (ANOVA followed by Tukey's multiple comparisons test) |
|-----------|----------------------------------|----------|---------------------------------------------------------------|
| GFP-Kv2.2 | 0.069 ± 0.019                    | 3 cells  | vs. control, ****, $1.358 \times 10^{-11}$                    |

|                 |               |         |                                                                  |
|-----------------|---------------|---------|------------------------------------------------------------------|
| GFP-Kv2.2 P412W | 0.067 ± 0.018 | 3 cells | vs. Kv2.2, ns, 0.9796; vs. control, 1.038x10 <sup>-12</sup>      |
| GFP-Kv2.1       | 0.062 ± 0.015 | 3 cells | vs. control, ****, 7.15x10 <sup>-13</sup>                        |
| GFP-Kv2.1 P404W | 0.066 ± 0.017 | 3 cells | vs. Kv2.1, ns, 0.8041; vs. control, ****, 8.49x10 <sup>-13</sup> |
| Control         | 0.093 ± 0.020 | 3 cells | N/A                                                              |

**Supplemental Table 20. Figure 11F**

| Sample   | RyR cluster size (μm <sup>2</sup> ) | n number  | p-value (two tailed, unpaired t-test) |
|----------|-------------------------------------|-----------|---------------------------------------|
| WT       | 0.22 ± 0.012                        | 3 animals | N/A                                   |
| Kv2.1 KO | 0.21 ± 0.0075                       | 3 animals | vs. WT, ns, 0.0884                    |
| Kv2.2 KO | 0.22 ± 0.012                        | 2 animals | vs. WT, ns, 0.5506                    |
| Kv2 dKO  | 0.17 ± 0.039                        | 3 animals | vs. WT, *, 0.0199                     |



## Supplemental Figure Legends.

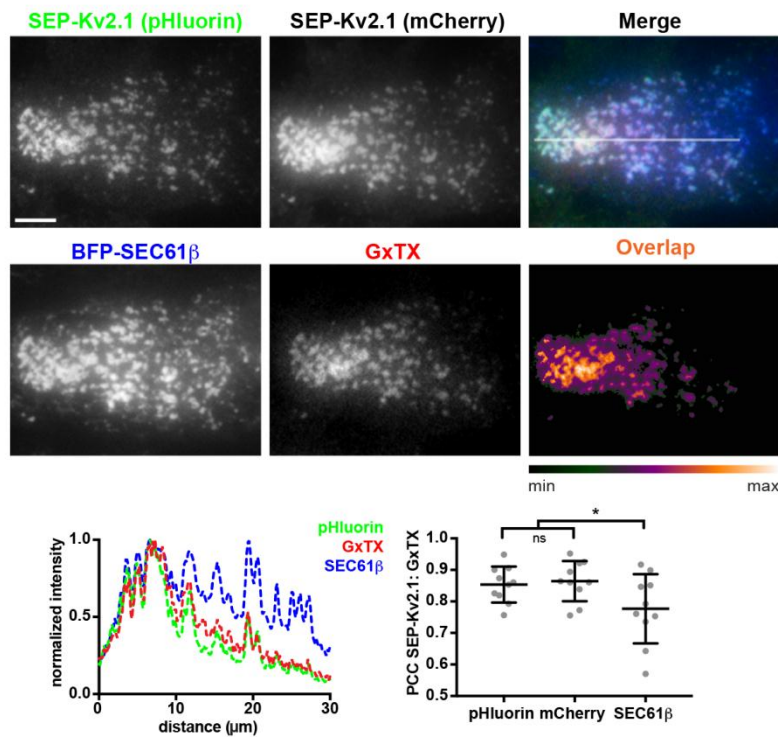

**Supplemental Figure 1.** Cell surface SEP-Kv2.1 at ER-PM junctions can be efficiently labeled with GxTX-633. Top panels. TIRF images of live HEK293T cells coexpressing SEP-Kv2.1 and BFP-SEC61β and surface labeled with GxTX-633. The merged image shows SEP-Kv2.1 (pHluorin), BFP-SEC61β, and GxTX-633. Scale bar is 5 μm and holds for all panels. Heat map shows overlap of SEP-Kv2.1 (pHluorin) and GxTX-633 pixels. Bottom left panel shows the normalized fluorescence intensity values across the line scan depicted by the white line in the merged image. Graph on bottom right shows PCC values between GxTX and SEP-Kv2.1 or BFP-SEC61β. Bars are mean ± SD. See Supplemental Table 4 for values and statistical analyses.

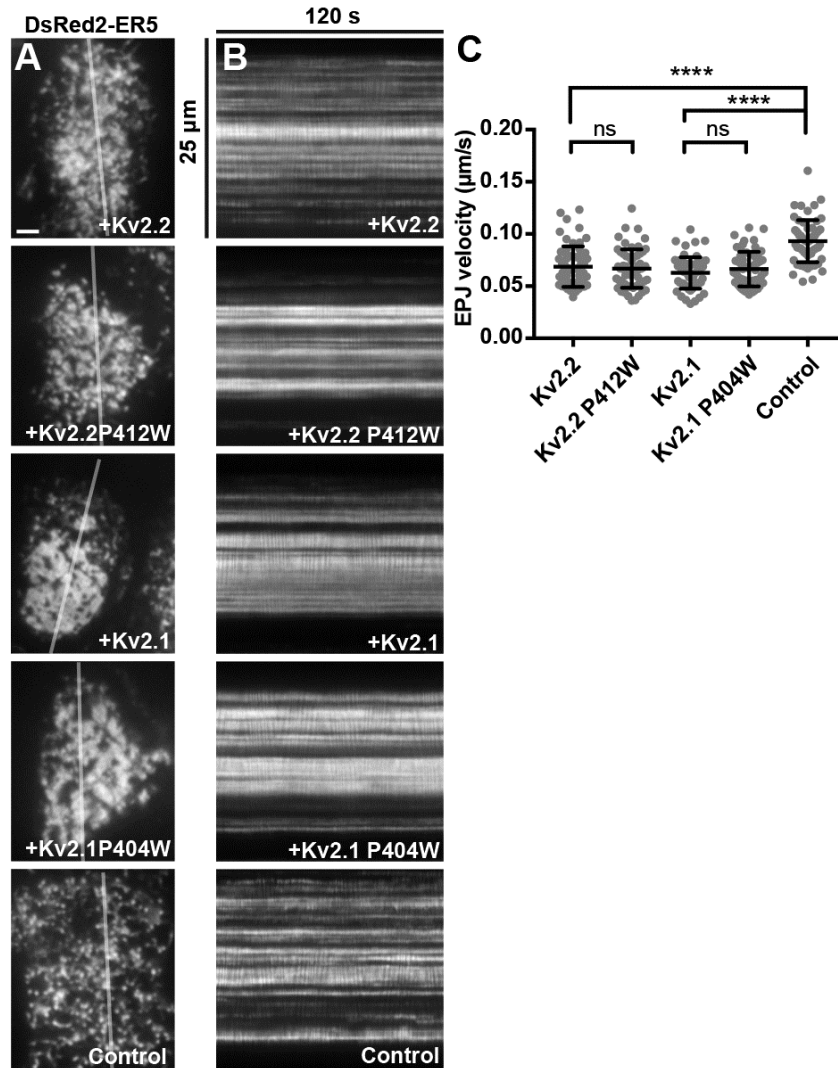

**Supplemental Figure 2.** Both wild-type and nonconducting Kv2 channel mutants stabilize ER-PM junctions in HEK293T cells. (A) TIRF images of DsRed2-ER5 expressed in live HEK293T cells with and without coexpression of wild-type and mutant Kv2 channel isoforms as labeled. Scale bar is 2.5 µm and holds for all panels. (B) Kymographs of DsRed2-ER5 mobility from regions indicated by the lines in the adjacent panels. (C) Graph of ER-PM junction (EPJ) velocity (as reported by DsRed2-ER5 in TIRF). Bars are mean  $\pm$  SD. See Supplemental Table 19 for values and statistical analyses.
